# Supplementary material for: Crystalline products of tolbutamide decomposition in water after microwave treatment
Source: Royal Society of Chemistry journal article supplement (doi:10.1039/c3ce40145f), 2013-01-01
Supplement: c3ce40145f.pdf [file c3ce40145f.pdf]

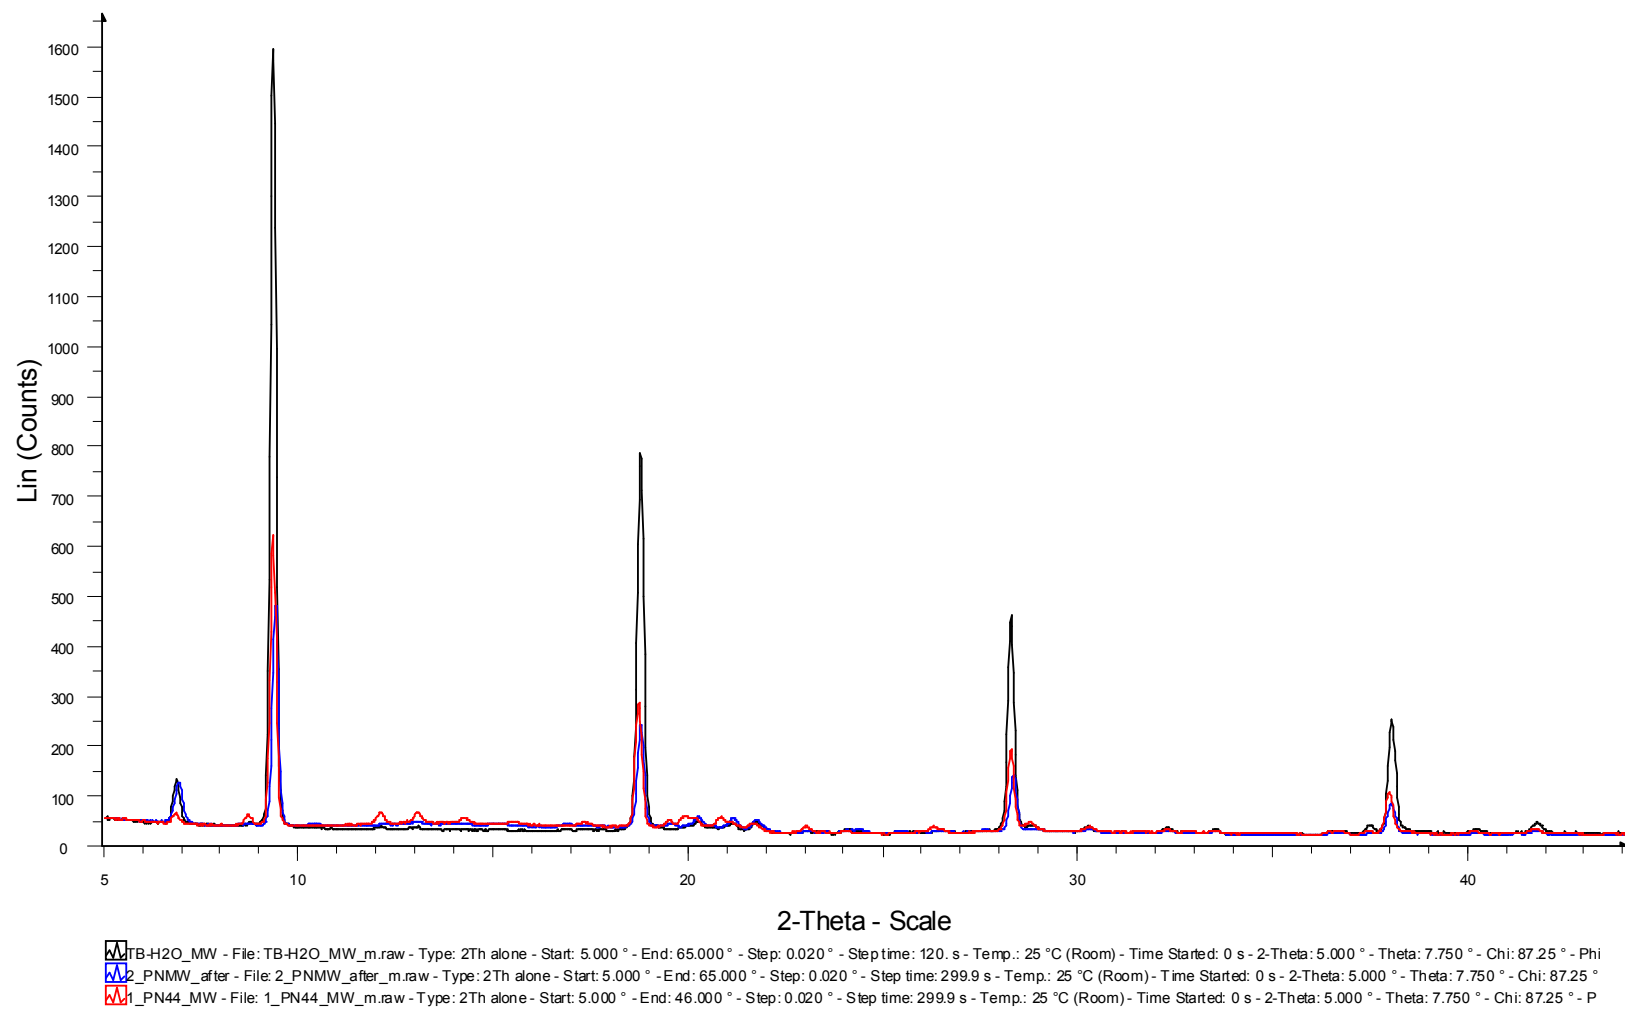

Fig. S1. X-ray powder diffraction patterns measured for the precipitate (black and blue are different samples at the same experiment, red is the sample after another experiment).

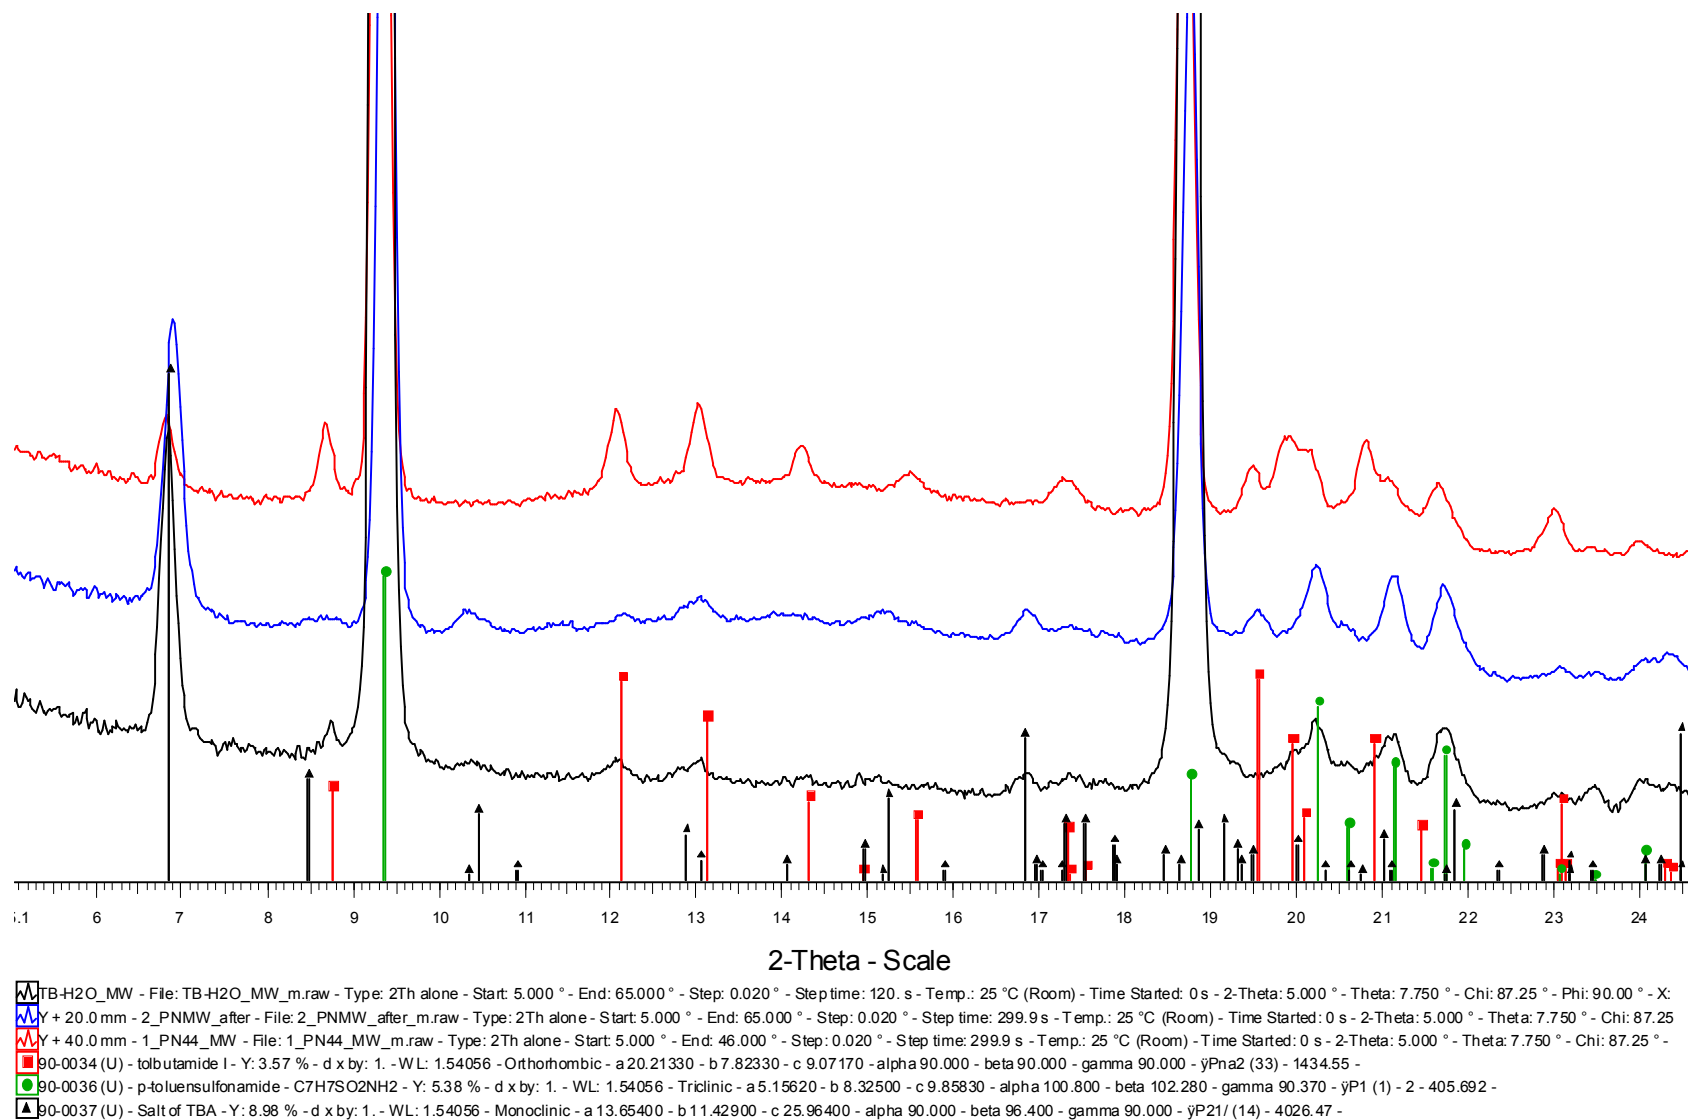

Fig. S2. The same powder diffraction patterns and calculated locations of peaks (red is for tolbutamide form I, black for compound A, green for compound B).
